# Supplementary material for: SMAD6 overexpression leads to accelerated myogenic differentiation of LMNA mutated cells
Source: PubMed Central journal article supplement (PMC5884786; doi:10.1038/s41598-018-23918-x), 2018-04-04

**SMAD6 overexpression leads to accelerated myogenic differentiation of *LMNA* mutated cells.**

Alexandre Janin<sup>1,2,3,4,9</sup>, Delphine Bauer<sup>1,2,3</sup>, Francesca Ratti<sup>1,2,3</sup>, Camille Valla<sup>1,2,3</sup>, Anne Bertrand<sup>5</sup>, Emilie Christin<sup>1,2,3</sup>, Emilie Chopin<sup>6</sup>, Nathalie Streichenberger<sup>1,2,3,7</sup>, Gisèle Bonne<sup>5</sup>, Vincent Gache<sup>1,2,3</sup>, Tatiana Cohen<sup>8</sup> and Alexandre Méjat<sup>1,2,3,9</sup>

1. Univ. Lyon, Université Claude Bernard Lyon 1, Institut NeuroMyoGène, F-69622, Villeurbanne, France
2. CNRS UMR 5310, F-69622 Villeurbanne, France
3. INSERM U1217, F-69622 Villeurbanne, France
4. Laboratoire de Cardiogénétique Moléculaire, Centre de Biologie et Pathologie Est, Hospices Civils de Lyon, F-69677 Bron, France
5. Sorbonne Université, INSERM UMRS\_974, Center of Research in Myology, 75013 Paris, France
6. Centre de Biotechnologie Cellulaire, Centre de Biologie et Pathologie Est, Hospices Civils de Lyon, F-69677 Bron, France
7. Centre de Neuropathologie Est, Centre de Biologie et Pathologie Est, Hospices Civils de Lyon, F-69677 Bron, France
8. Research Center for Genetic Medicine, Children's National Medical Center; 111 Michigan Avenue NW, Washington DC 20010, USA
9. Corresponding authors: [alexandre.janin01@chu-lyon.fr](mailto:alexandre.janin01@chu-lyon.fr) and [alexandre.mejat@ens-lyon.fr](mailto:alexandre.mejat@ens-lyon.fr)

**Supplementary Dataset:** Differentially expressed genes in *Lmna* vs WT myoblasts

**Supplementary Table S1: Characteristics of the patients.**

|   | Gender | LMNA mutation | Symptoms                                                                           | Maximal CK level | Age of onset |
|---|--------|---------------|------------------------------------------------------------------------------------|------------------|--------------|
| 1 | M      | p.Lys32del    | Abnormal gait, Diffuse muscle contraction                                          | 4X               | 14 months    |
| 2 | F      | p.Lys32del    | Axial hypotonia, axial and proximal muscle weakness, motor delay                   | 4X               | 11 months    |
| 3 | F      | p.Leu380Ser   | Fetal immobility, hypotonia, talipes, axial and proximal muscle weakness           | 4X               | Birth        |
| 4 | M      | p.His222Pro   | Elbow flexion, axial and proximal muscle weakness, rigid spine, cardiac arrhythmia | Not tested       | Birth        |
| 5 | M      | p.Gln310*     | Cardiomyopathy, diffuse muscle pain, walking difficulties, chronic tiredness,      | 2X               | 38 years old |

**Supplementary Figure S2:** Control of the population purity after extraction of human myoblasts with a desmin labelling (in green) by immunofluorescence assay.

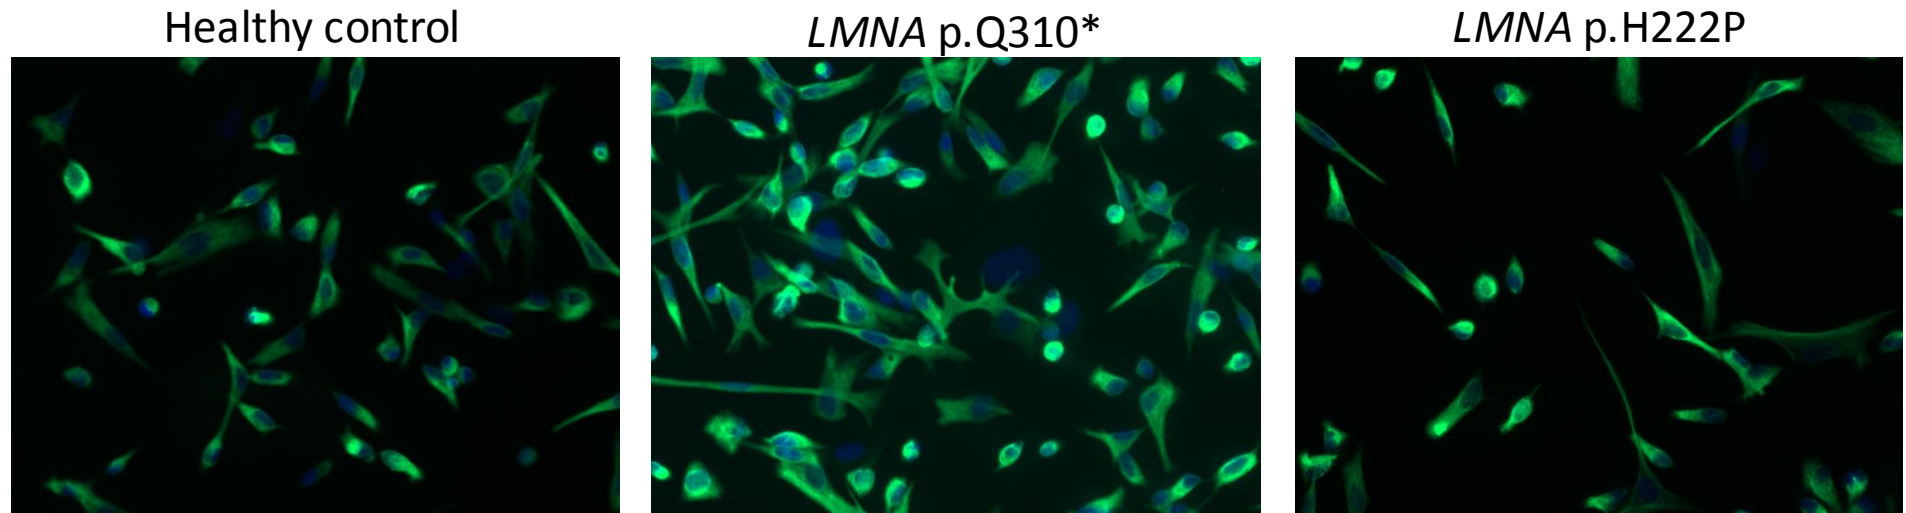

**Supplementary Table S3:** Sequences of primers used for RT-qPCR experiments.

| Gene                                 | Forward primer (5'-3') | Reverse Primer (5'-3') |
|--------------------------------------|------------------------|------------------------|
| <b>MOUSE</b>                         |                        |                        |
| <i>Bmp4</i>                          | TTCCTGGACACCTCATCACA   | CCACTCCCTTGAGGTAACGA   |
| <i>Bmp4</i> (2 <sup>nd</sup> couple) | ACGTAGTCCCAAGCATCACC   | ATGGCATGGTTGGTTGAGTT   |
| <i>Bmpr1a</i>                        | ATGCAAGGATTCACCGAAAG   | AGCAAAGCAGCTGGAGAAG    |
| <i>Bmpr1b</i>                        | TGACTCTGGAATGCCTGTTG   | AGAGTGGGGTGGAGGTCTTT   |
| <i>Bmpr2</i>                         | TGGCAGTGAGGTCACTCAAG   | TTGCGTTCATTCTGCATAGC   |
| <i>Smad1</i>                         | CAGCAGCTACCCCAACTCTC   | CGTAAGCAACTGCCTGAACA   |
| <i>Smad4</i>                         | CCCCTGAAGGACATTCGAT    | GCCCTGAAGCTATCTGCAAC   |
| <i>Smad5</i>                         | ATTGTTGGGCTGGAACAAG    | AAACTTGCAGACGTCCATCC   |
| <i>Smad6</i>                         | ACGGTGACCTGCTGTCTCTT   | AGCGAGTACGTGACCGTCTT   |
| <i>Smad8</i>                         | CTTCACCGACCCTTCCAATA   | TCTGGACAAAGATGCTGCTG   |
| <i>Id1</i>                           | CATGAACGGCTGCTACTCAC   | GTGGTCCCGACTTCAGACTC   |
| <i>Id2</i>                           | CTCCAAGCTCAAGGAAGTGG   | ATGCTGATGTCCGTGTTGAG   |
| <i>Myog</i>                          | CTACAGGCCTTGCTCAGCTC   | ACGATGGACGTAAGGGAGTG   |
| <i>CycloB</i>                        | GATGGCACAGGAGGAAAGAG   | AACTTTGCCGAAAACCATAT   |
| <i>Hprt</i>                          | AGGACCTCTCGAAGTGTTGG   | TGGCAACATCAACAGGACTC   |
| <i>Ppib</i>                          | AACTTTGGCATTGTGGAAGG   | ACACATTGGGGGTAGGAACA   |
| <b>HUMAN</b>                         |                        |                        |
| <i>LMNA</i>                          | AGCAAAGTGCGTGAGGAGTT   | TCAGGTCACCCTCCTTCTTG   |
| <i>BMP4</i>                          | CCTAGCAAGAGTGCCGTCAT   | GTTCTTCGTGGTGGGAAGCTC  |
| <i>SMAD1</i>                         | ACCTGCTTACCTGCCTCCTG   | CATAAGCAACCGCCTGAACA   |
| <i>SMAD4</i>                         | CATCCTGCTCCTGAGTATTGG  | GGGTCCACGTATCCATCAAC   |
| <i>SMAD6</i>                         | TACCACTTCAGCCGGCTCTG   | AGTACGCCACGCTGCACCAG   |
| <i>IDI</i>                           | GCTGCTCTACGACATGAACG   | CCAACTGAAGGTCCTGATG    |
| <i>HPRT</i>                          | TGCTCGAGATGTGATGAAGG   | TCCCCTGTTGACTGGTCATT   |
| <i>GAPDH</i>                         | GAGTCAACGGATTTGGTCGT   | TTGATTTTGGAGGGATCTCG   |

**Supplementary Table S4:** List of used antibodies.

| Protein           | Supplier       | Reference |
|-------------------|----------------|-----------|
| <b>BMP4</b>       | Abcam          | Ab39973   |
| <b>BMPR1A</b>     | Abcam          | Ab38560   |
| <b>BMPR1B</b>     | Abcam          | Ab175385  |
| <b>BMPR2</b>      | Cell Signaling | #6979     |
| <b>ID1</b>        | Abcam          | Ab134163  |
| <b>LAMIN A/C</b>  | SantaCruz      | Sc6215    |
| <b>LAMIN B</b>    | SantaCruz      | Sc6217    |
| <b>pSMAD1/5/9</b> | Cell Signaling | #13820    |
| <b>SMAD1</b>      | Cell Signaling | #6944     |
| <b>SMAD4</b>      | Cell Signaling | #9515     |
| <b>SMAD6</b>      | Abcam          | Ab13727   |
| <b>MYOGENIN</b>   | Dako           | M3559     |

**Supplementary Table S5:** Enriched GO biological processes in downregulated gene set

| TOP 24 GO Biological Processes enriched in the downregulated gene set | Overlap | P-value     | Adjusted P-value | Old P-value | Old Adjusted P-value | Z-score      | Combined Score |
|-----------------------------------------------------------------------|---------|-------------|------------------|-------------|----------------------|--------------|----------------|
| muscle filament sliding (GO:0030049)                                  | 15/38   | 4,60551E-23 | 2,06788E-20      | 7,23769E-21 | 3,24972E-18          | -2,485464424 | 112,654123     |
| skeletal muscle contraction (GO:0003009)                              | 8/17    | 1,36583E-13 | 3,0663E-11       | 4,06828E-12 | 9,13329E-10          | -2,791631654 | 67,57972348    |
| cardiac muscle contraction (GO:0060048)                               | 7/33    | 3,16408E-09 | 4,73558E-07      | 9,90408E-09 | 1,48231E-06          | -2,812158767 | 40,95344606    |
| muscle contraction (GO:0006936)                                       | 8/85    | 1,79108E-07 | 2,01049E-05      | 2,59975E-07 | 2,91822E-05          | -2,599239354 | 28,10959666    |
| regulation of ATPase activity (GO:0043462)                            | 3/8     | 1,99363E-05 | 0,001491896      | 5,19866E-05 | 0,003870666          | -2,556517204 | 16,63706603    |
| sarcomere organization (GO:0045214)                                   | 4/28    | 4,61347E-05 | 0,002589307      | 6,86158E-05 | 0,003870666          | -2,296022284 | 13,67594653    |
| cardiac myofibril assembly (GO:0055003)                               | 3/9     | 2,97465E-05 | 0,001908024      | 6,89651E-05 | 0,003870666          | -1,922844334 | 12,04024927    |
| skeletal muscle tissue development (GO:0007519)                       | 3/19    | 0,000325484 | 0,01623802       | 0,000458939 | 0,022895945          | -2,306655923 | 9,504344777    |
| striated muscle contraction (GO:0006941)                              | 3/21    | 0,000442054 | 0,019848247      | 0,000597115 | 0,026810444          | -2,38487726  | 9,347859342    |
| type I interferon signaling pathway (GO:0060337)                      | 4/62    | 0,001040045 | 0,031604026      | 0,001147665 | 0,039638594          | -2,683642894 | 9,270565888    |
| positive regulation of B cell proliferation (GO:0030890)              | 3/23    | 0,000582458 | 0,021793627      | 0,00075934  | 0,030994876          | -2,251270142 | 8,613669539    |
| positive regulation of apoptotic process (GO:0043065)                 | 6/231   | 0,006617016 | 0,076180519      | 0,00623454  | 0,075656989          | -3,156974903 | 8,128103872    |
| positive regulation of ERK1 and ERK2 cascade (GO:0070374)             | 5/148   | 0,004380498 | 0,056784163      | 0,004304687 | 0,05856983           | -2,776825578 | 7,965318107    |
| positive regulation of bone mineralization (GO:0030501)               | 3/30    | 0,001286979 | 0,033110354      | 0,0015382   | 0,046043448          | -2,280533916 | 7,771852567    |
| nervous system development (GO:0007399)                               | 6/247   | 0,009052455 | 0,092442673      | 0,008480798 | 0,090663764          | -3,032366047 | 7,220568678    |
| heart development (GO:0007507)                                        | 4/79    | 0,002549436 | 0,043511702      | 0,002674305 | 0,052207086          | -2,25694708  | 7,074909272    |
| positive regulation of transcription, DNA-templated (GO:0045893)      | 8/464   | 0,019284993 | 0,141950196      | 0,017143845 | 0,1374569            | -3,558112099 | 6,946427579    |
| positive regulation of epithelial cell proliferation (GO:0050679)     | 3/32    | 0,00155583  | 0,034928393      | 0,001826735 | 0,046824017          | -1,934657821 | 6,489723035    |
| regulation of striated muscle contraction (GO:0006942)                | 2/8     | 0,001401106 | 0,033110354      | 0,002085702 | 0,046824017          | -1,56884597  | 5,346484653    |
| cellular response to interleukin-6 (GO:0071354)                       | 2/9     | 0,001792923 | 0,036591937      | 0,002537639 | 0,051790907          | -1,576319438 | 5,214350214    |
| positive regulation of protein phosphorylation (GO:0001934)           | 4/113   | 0,00905897  | 0,092442673      | 0,009019704 | 0,094182491          | -2,110522757 | 5,025506247    |
| regulation of the force of heart contraction (GO:0002026)             | 2/11    | 0,002713425 | 0,043511702      | 0,003566314 | 0,057188398          | -1,561015131 | 4,893353735    |
| platelet degranulation (GO:0002576)                                   | 4/122   | 0,011762877 | 0,105806521      | 0,011615805 | 0,110021413          | -1,962711065 | 4,408529974    |
| apoptotic signaling pathway (GO:0097190)                              | 3/60    | 0,009272053 | 0,092514481      | 0,009632532 | 0,096111263          | -1,722794121 | 4,100922067    |

## Supplementary Table S6: Enriched GO biological processes in upregulated gene set

| Term                                                                                                   | Overlap | P-value     | Adjusted P-value | Old P-value | Old Adjusted P-value | Z-score      | Combined Score |
|--------------------------------------------------------------------------------------------------------|---------|-------------|------------------|-------------|----------------------|--------------|----------------|
| extracellular matrix organization (GO:0030198)                                                         | 9/142   | 8,07029E-06 | 0,004559713      | 1,47853E-05 | 0,00835372           | -2,983793958 | 16,08412823    |
| negative regulation of apoptotic process (GO:0043066)                                                  | 9/323   | 0,00358124  | 0,165340618      | 0,004739409 | 0,236465732          | -4,584891087 | 8,251646654    |
| positive regulation of cell proliferation (GO:0008284)                                                 | 9/326   | 0,003804297 | 0,165340618      | 0,005022281 | 0,236465732          | -4,51742088  | 8,130217311    |
| positive regulation of cell migration (GO:0030335)                                                     | 7/144   | 0,000431361 | 0,097485905      | 0,000630174 | 0,178024128          | -3,118805915 | 7,260728246    |
| negative regulation of calcium ion transport (GO:0051926)                                              | 2/8     | 0,002371056 | 0,148849616      | 0,003915212 | 0,236465732          | -3,374987589 | 6,428739718    |
| positive regulation of angiogenesis (GO:0045766)                                                       | 5/77    | 0,00079523  | 0,097485905      | 0,001143384 | 0,210400217          | -2,684285766 | 6,249144708    |
| positive regulation of gene expression (GO:0010628)                                                    | 6/214   | 0,01589623  | 0,237381949      | 0,019433041 | 0,265201106          | -3,052492172 | 4,389742703    |
| mitochondrial translational termination (GO:0070126)                                                   | 4/87    | 0,009182494 | 0,212659302      | 0,011415406 | 0,265201106          | -2,832242632 | 4,384492623    |
| embryonic skeletal system development (GO:0048706)                                                     | 2/10    | 0,003763743 | 0,165340618      | 0,005670567 | 0,246451567          | -2,323704348 | 4,182081285    |
| mitochondrial translational elongation (GO:0070125)                                                    | 4/87    | 0,009182494 | 0,212659302      | 0,011415406 | 0,265201106          | -2,675208111 | 4,141393148    |
| negative regulation of canonical Wnt signaling pathway (GO:0090090)                                    | 5/140   | 0,010463235 | 0,21895287       | 0,012949129 | 0,265201106          | -2,707187479 | 4,111943748    |
| regulation of apoptotic process (GO:0042981)                                                           | 5/155   | 0,015679627 | 0,237381949      | 0,019050487 | 0,265201106          | -2,852879126 | 4,102682208    |
| negative regulation of cell migration (GO:0030336)                                                     | 4/78    | 0,006279581 | 0,197109072      | 0,00797859  | 0,253358786          | -2,472639889 | 4,015562335    |
| execution phase of apoptosis (GO:0097194)                                                              | 3/37    | 0,005021537 | 0,189144545      | 0,006598143 | 0,250846102          | -2,344257394 | 3,903760022    |
| positive regulation of macrophage activation (GO:0043032)                                              | 2/8     | 0,002371056 | 0,148849616      | 0,003915212 | 0,236465732          | -2,019923755 | 3,847588689    |
| positive regulation of apoptotic signaling pathway (GO:2001235)                                        | 2/9     | 0,003029682 | 0,165340618      | 0,00475526  | 0,236465732          | -2,136995608 | 3,846052682    |
| cellular response to UV (GO:0034644)                                                                   | 3/40    | 0,006255198 | 0,197109072      | 0,008071607 | 0,253358786          | -2,277413016 | 3,698514277    |
| negative regulation of cysteine-type endopeptidase activity involved in apoptotic process (GO:0043154) | 3/45    | 0,00868177  | 0,212659302      | 0,010926756 | 0,265201106          | -2,156784302 | 3,338839956    |
| positive regulation of microtubule polymerization (GO:0031116)                                         | 2/15    | 0,008515137 | 0,212659302      | 0,011324193 | 0,265201106          | -2,12361531  | 3,287492236    |
| proteolysis (GO:0006508)                                                                               | 5/175   | 0,02499537  | 0,238386173      | 0,029766942 | 0,265201106          | -2,237109848 | 3,207709811    |
| negative regulation of cell proliferation (GO:0008285)                                                 | 6/276   | 0,046583065 | 0,238386173      | 0,054572498 | 0,265201106          | -2,200130482 | 3,154686452    |
| positive regulation of epidermal growth factor-activated receptor activity (GO:0045741)                | 2/8     | 0,002371056 | 0,148849616      | 0,003915212 | 0,236465732          | -1,548106903 | 2,948863092    |
| cellular response to mechanical stimulus (GO:0071260)                                                  | 3/47    | 0,009786092 | 0,212659302      | 0,012211971 | 0,265201106          | -1,859336853 | 2,878372292    |
| negative regulation of ossification (GO:0030279)                                                       | 2/11    | 0,004571777 | 0,18450386       | 0,006659631 | 0,250846102          | -1,622035674 | 2,741377991    |

**Supplementary Figure S7:** *Lmna* knock-down in H-2K wild-type myoblasts recapitulates decrease in *Bmp4* expression and *Smad6* overexpression found in *Lmna*<sup>-/-</sup> H-2K cells. Expression is shown as mean ( $\pm$  SEM) of biological replicates (n=3). Values are relative expression normalized on *Hprt1* housekeeping gene expression.

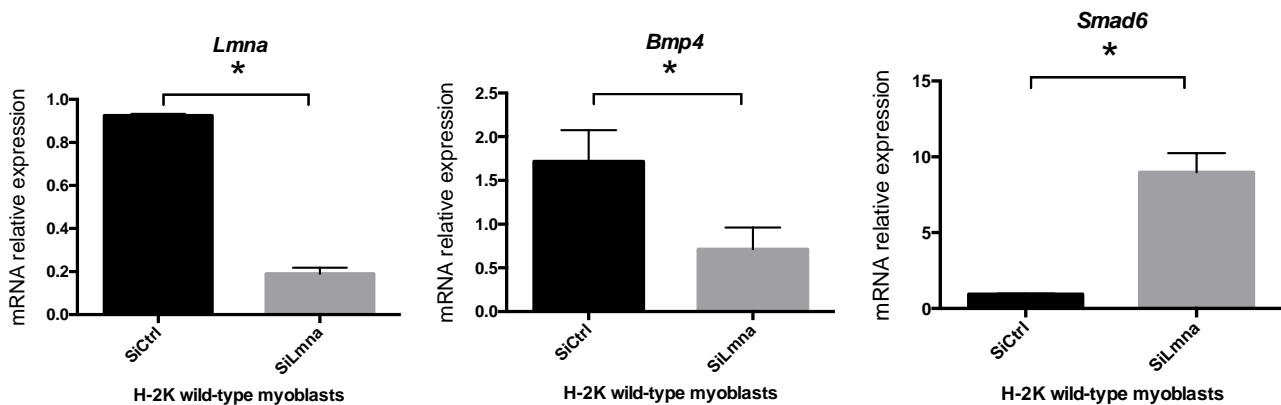

**Supplementary Figure S8:** *Lmna* overexpression in H-2K *Lmna*<sup>-/-</sup> myoblasts is able to reach *Bmp4* and *Smad6* expression found in wild-type H-2K cells, at the proliferation stage. Expression is shown as mean ( $\pm$  SEM) of biological replicates (n=3). Values are relative expression normalized on *Hprt1* housekeeping gene expression. Statistics are comparison to H-2K WT expression level (\* $p$ <0.05, \*\* $p$ <0.01). (Cells were seeded at 100.000 cells per wells of 6-well plated, transfected thanks to JetPrime™ reagent twenty-four after according to manufacturer's instructions and collected twenty-four hours later. NT : non transfected cells, 500ng and 1000ng : quantity of plasmid encoded *LMNA* cDNA used for transfection.)

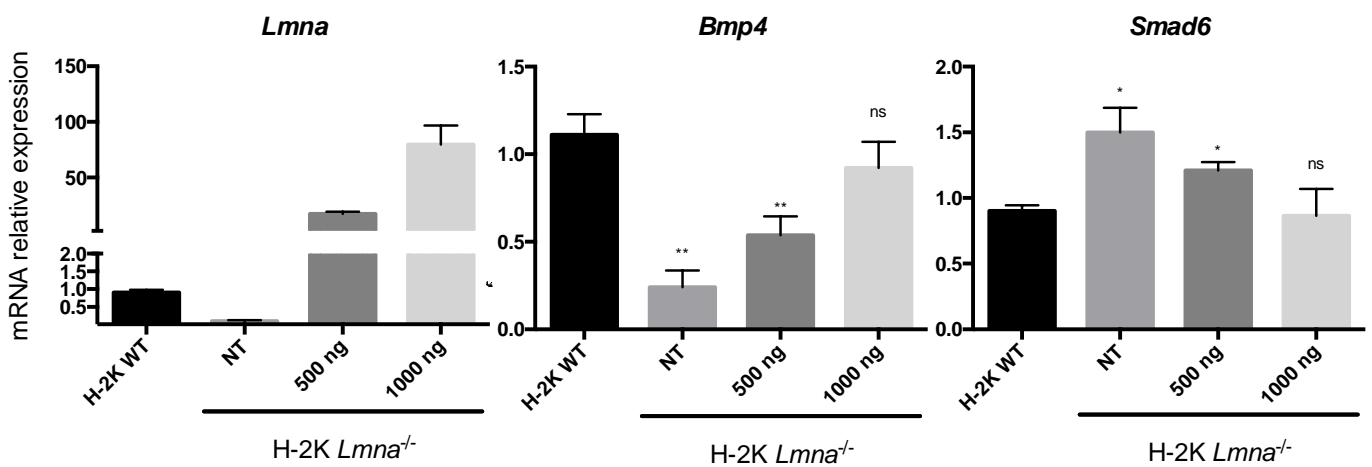

**Supplementary Figure S9:** Expression of *BMP4* and *SMAD6* measured by quantitative reverse transcription polymerase chain reaction (qRT-PCR) in MB from a healthy control and from carriers of various *LMNA* mutations (p.H222P, p.ΔK32 from 2 different patients and p.L380S). Expression is shown as mean ( $\pm$  SEM) of biological replicates (n=3). Values are relative expression normalized on *HPRT* housekeeping gene expression. Statistics are comparison to healthy control expression level (\* $p$ <0.05, \*\* $p$ <0.01, \*\*\* $p$ <0.001, \*\*\*\* $p$ <0.0001).

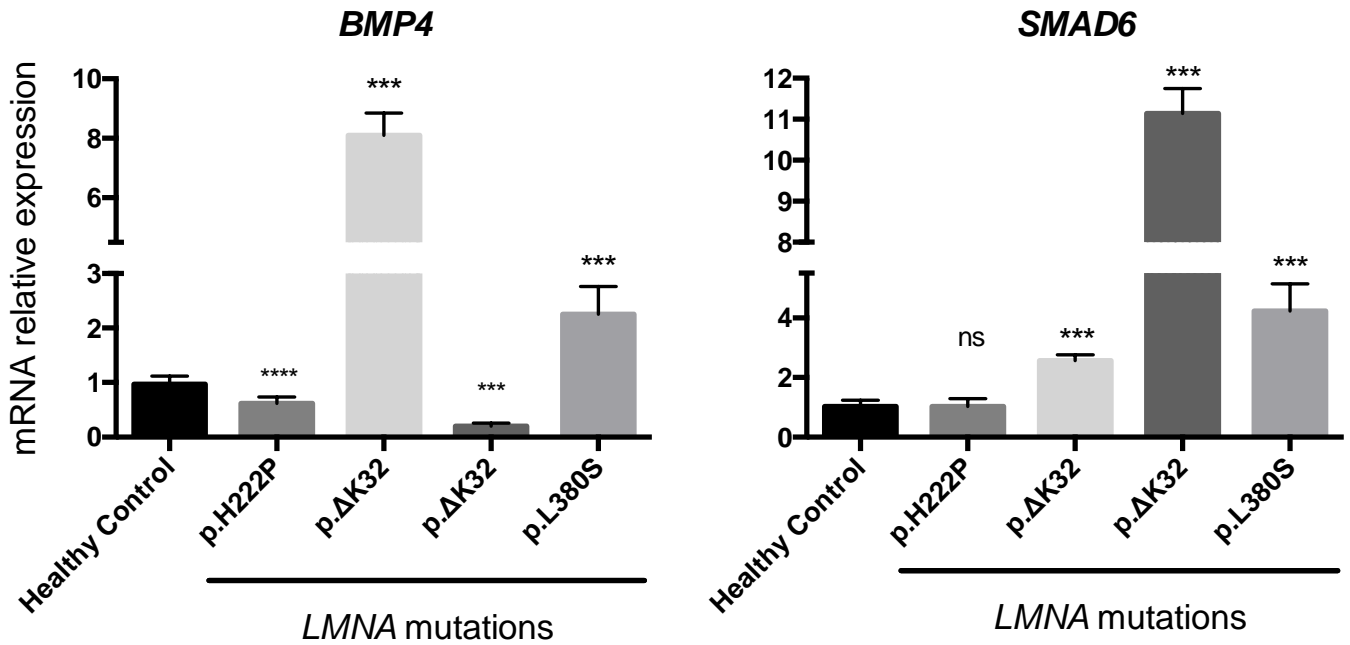

**Supplementary Figure S10:** Lamin B1 expression of *Lmna*<sup>-/-</sup> H-2K myoblasts.

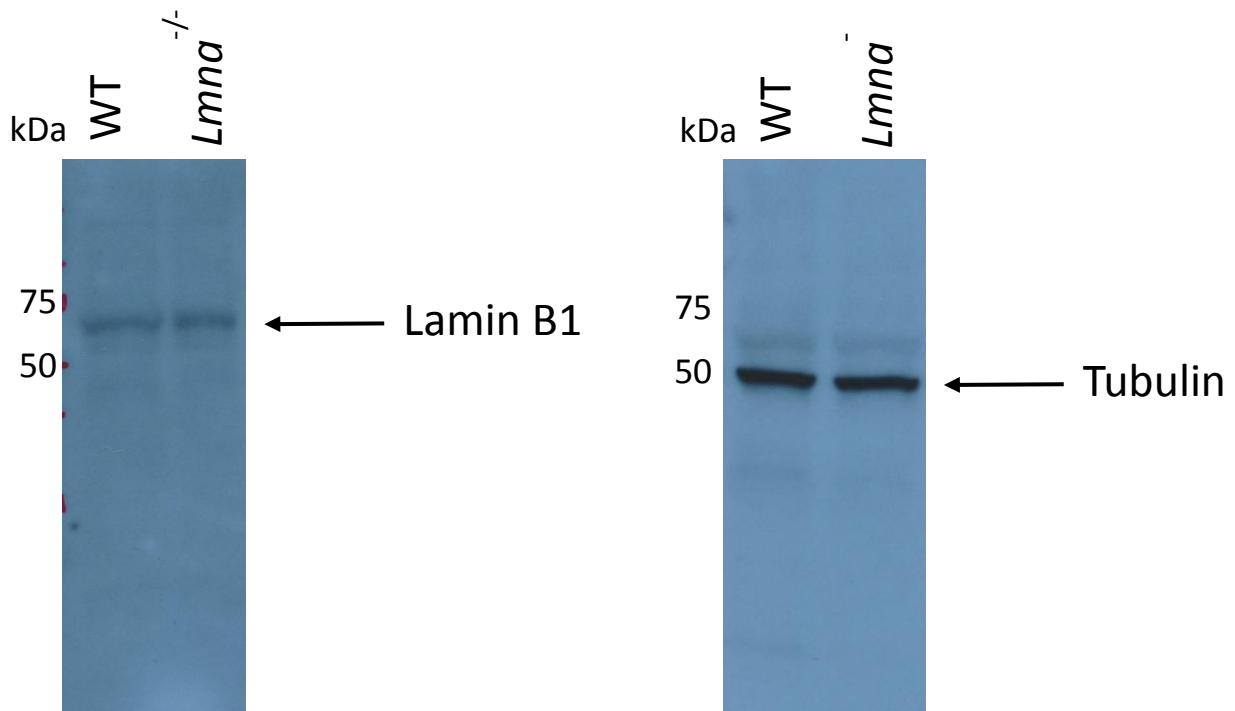

**Supplementary Figure S11:** Lamins A/C and B1 localisation in wild-type and *Lmna*<sup>-/-</sup> H-2K myoblasts. Lamin A/C (left) or lamin B1 (right) was labelled in red, nuclei were stained by DAPI in blue.

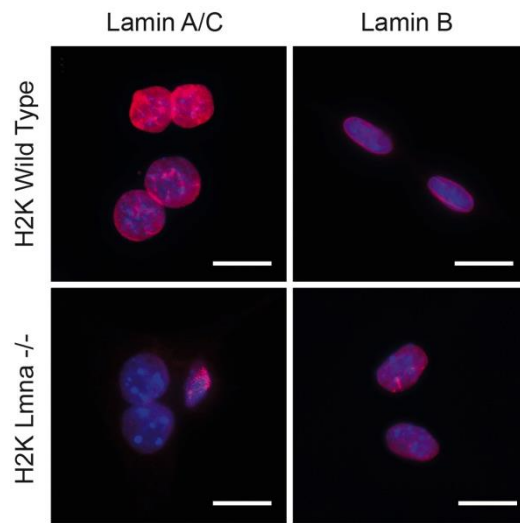



Unprocessed original scans of western blots shown in  
figure 2-7

**Figure 2.** Bmp4 and Bmp receptors (BmpR) expression in *Lmna*<sup>-/-</sup> vs wild-type H-2K myoblasts.

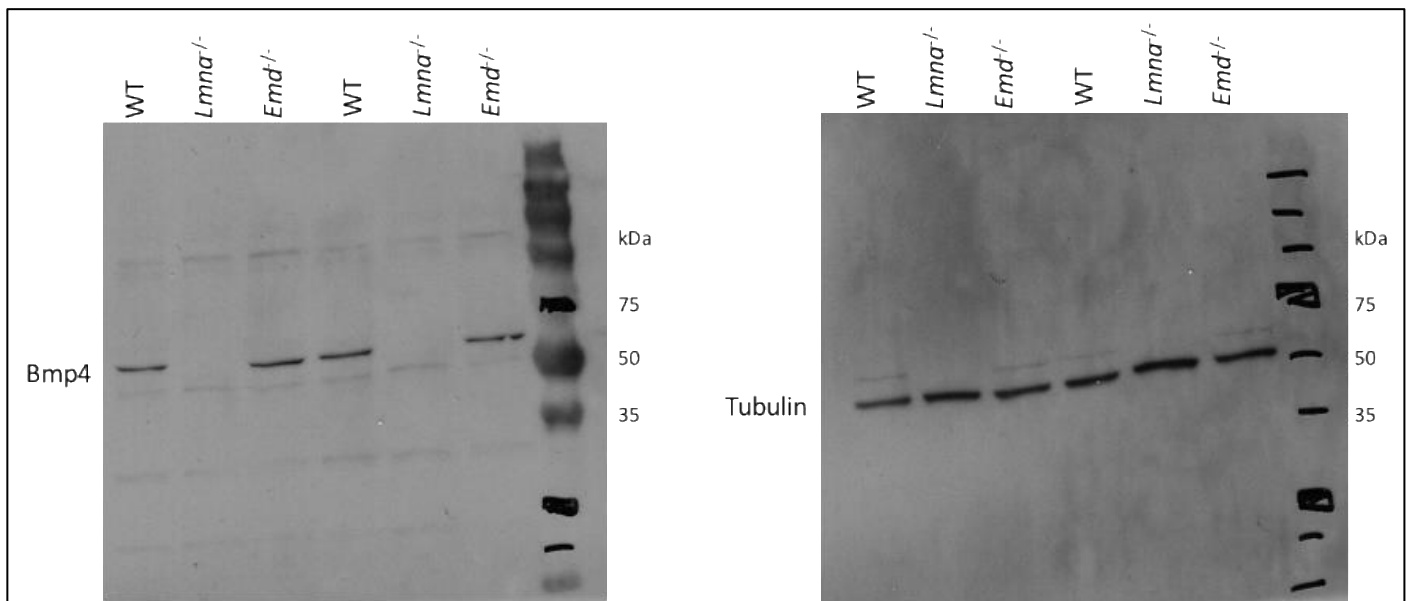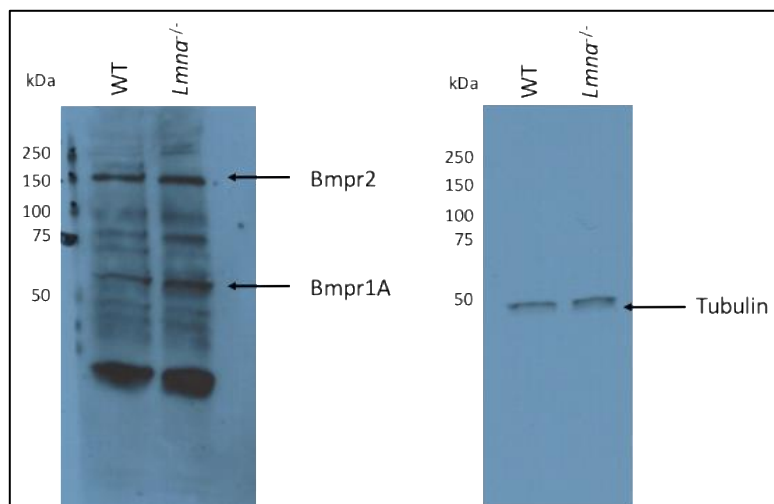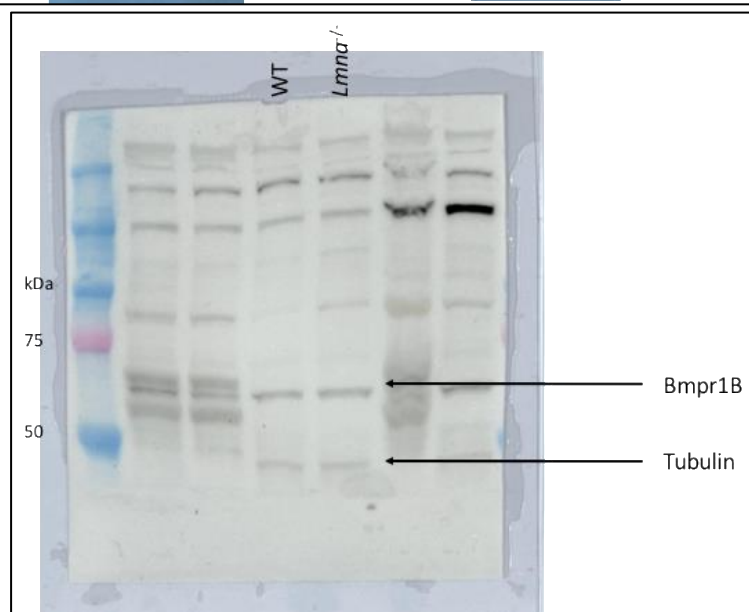

**Figure 3.** Smads expression and intracellular localization.

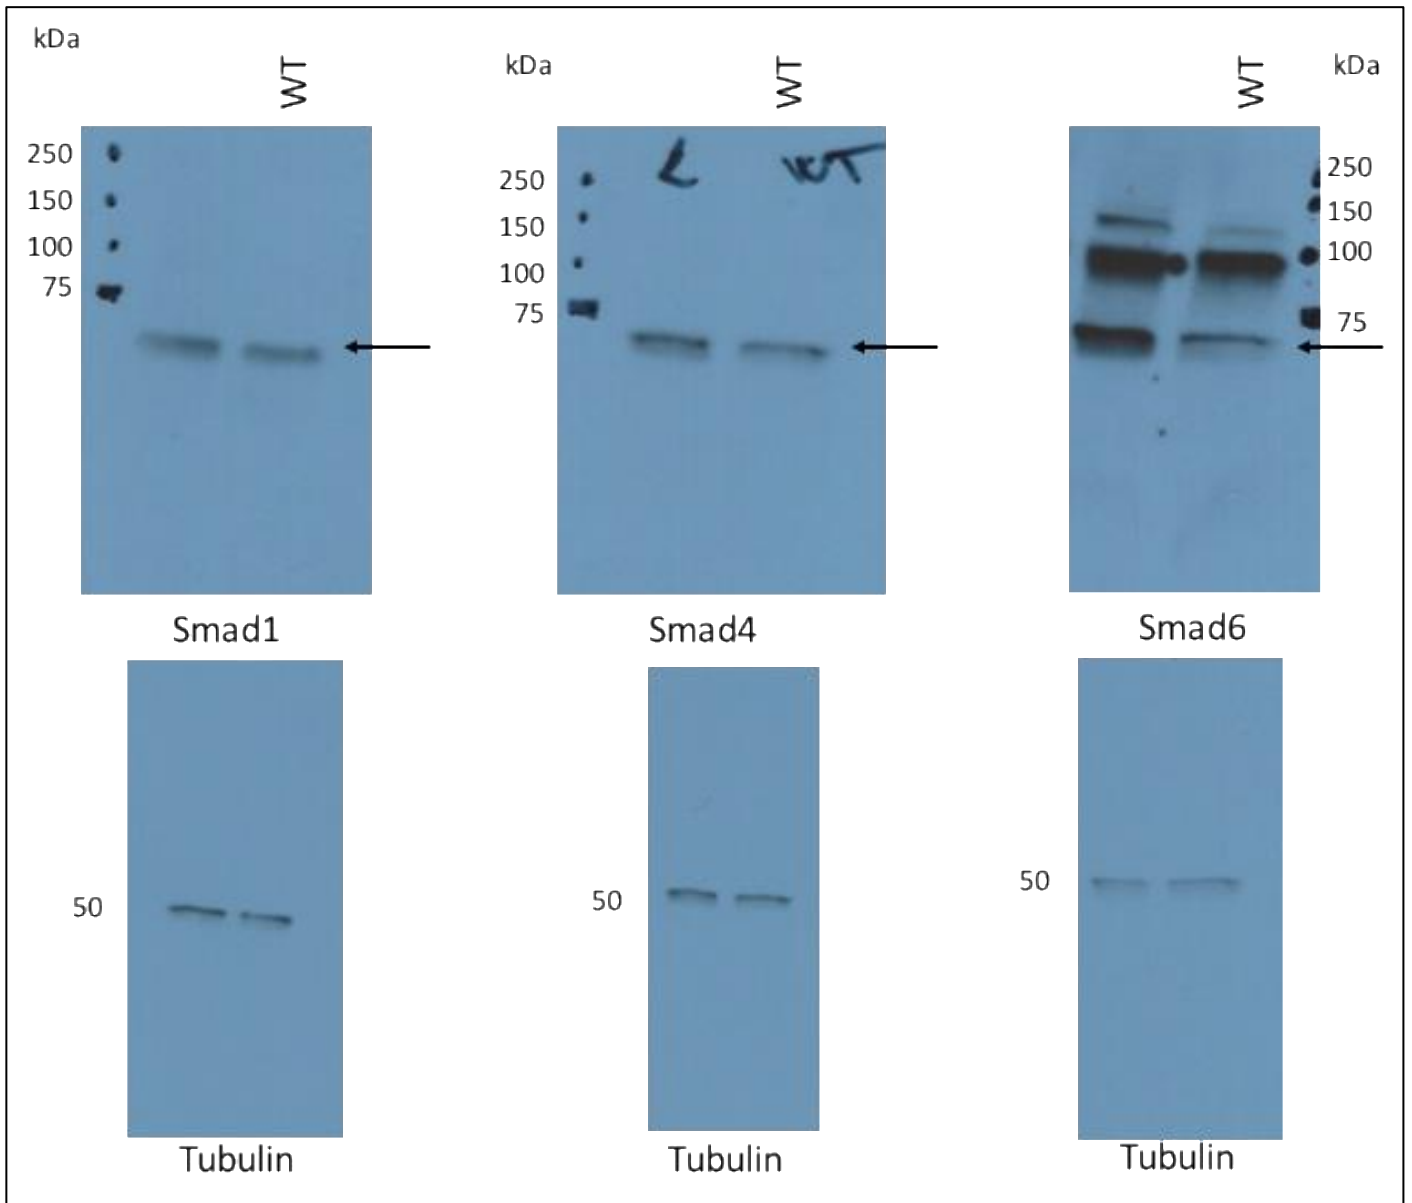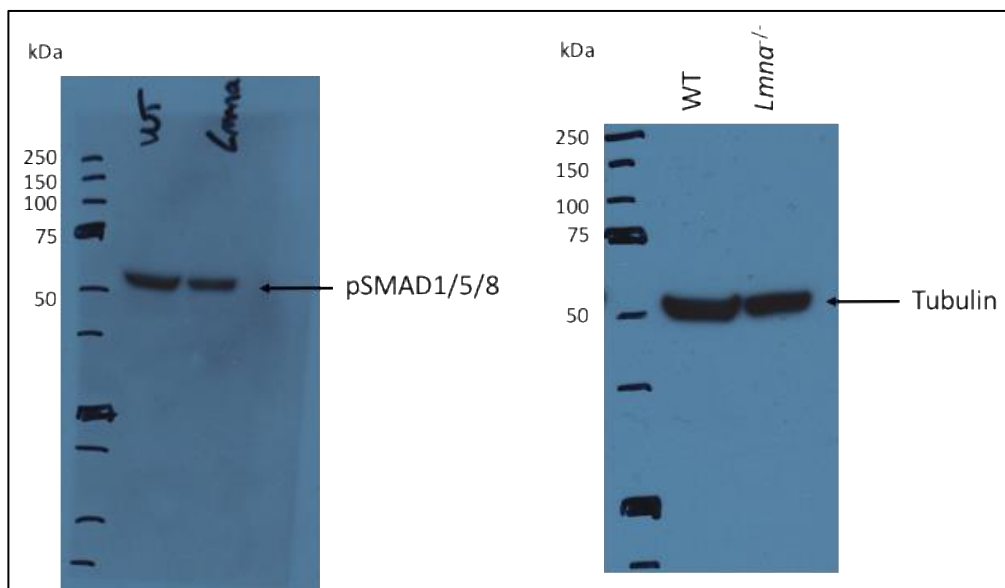

**Figure 4.** *Lmna*<sup>-/-</sup> myoblasts premature differentiation.

H-2K wild-type samples. Six time-points : proliferation and after 6, 12, 18, 24 and 48 hours of differentiation.

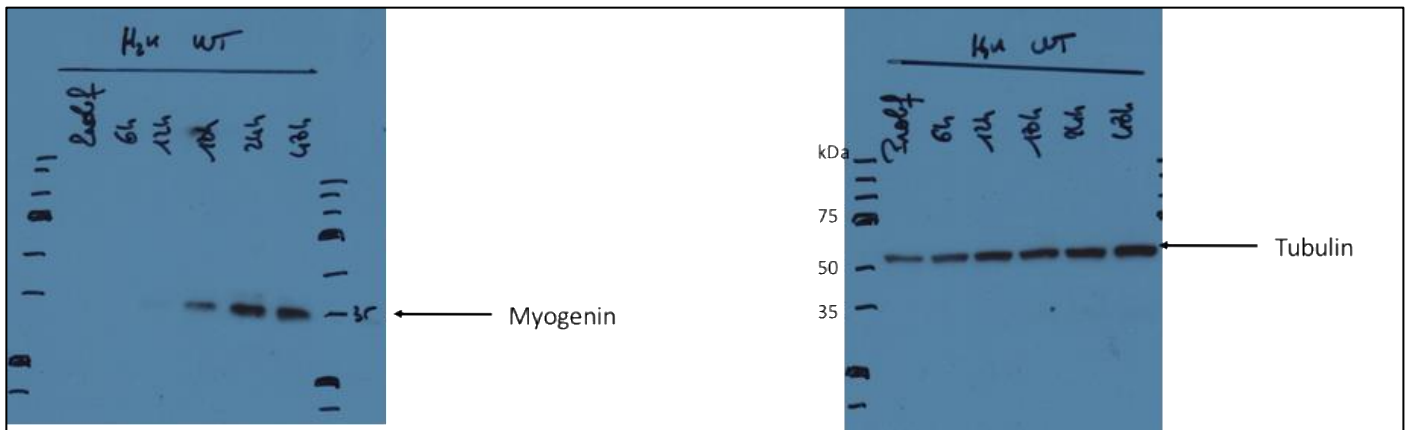

H-2K *Lmna*<sup>-/-</sup> samples. Six time-points : proliferation and after 6, 12, 18, 24 and 48 hours of differentiation.

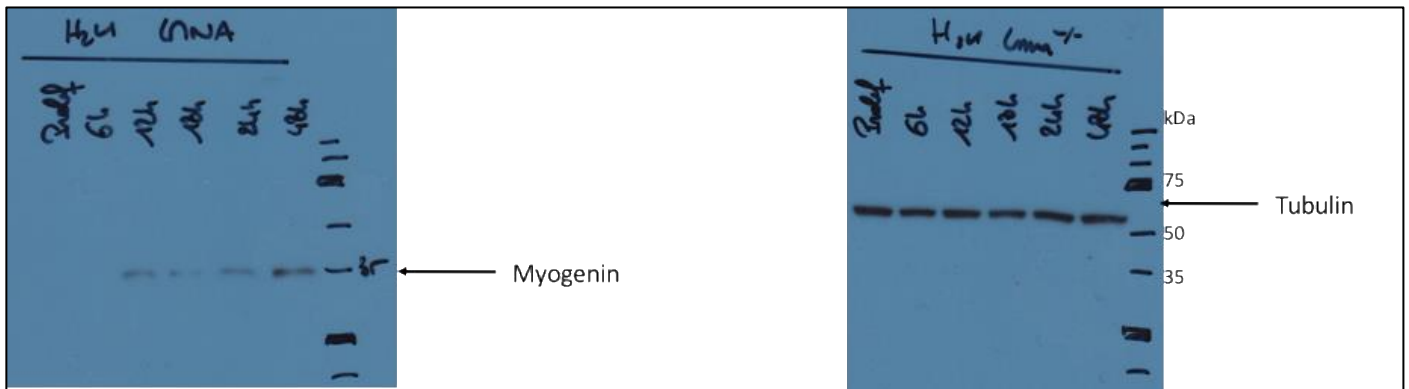

**Figure 5.** Wild-type and *Lmna*<sup>-/-</sup> myoblasts response to recombinant Bmp4 addition.

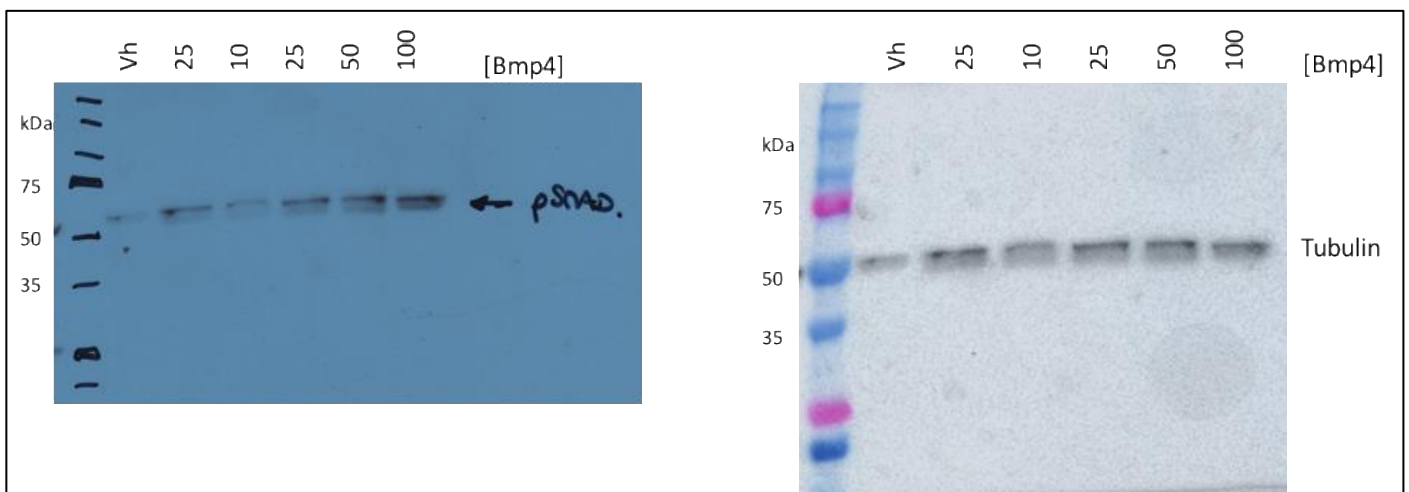

pSMAD 1/5/8

Tubulin

**Figure 6.** Precocious differentiation rescue in *Lmna*<sup>-/-</sup> MB by *Smad6* inactivation.

- 4 Samples :  
1/ H-2K Wild-type (WT) + Control siRNA  
2/ H-2K Wild-type (WT) + siRNA against *Smad6* (Si1)  
3/ H-2K *Lmna*<sup>-/-</sup> + Control siRNA  
4/ H-2K *Lmna*<sup>-/-</sup> + siRNA against *Smad6* (Si1)

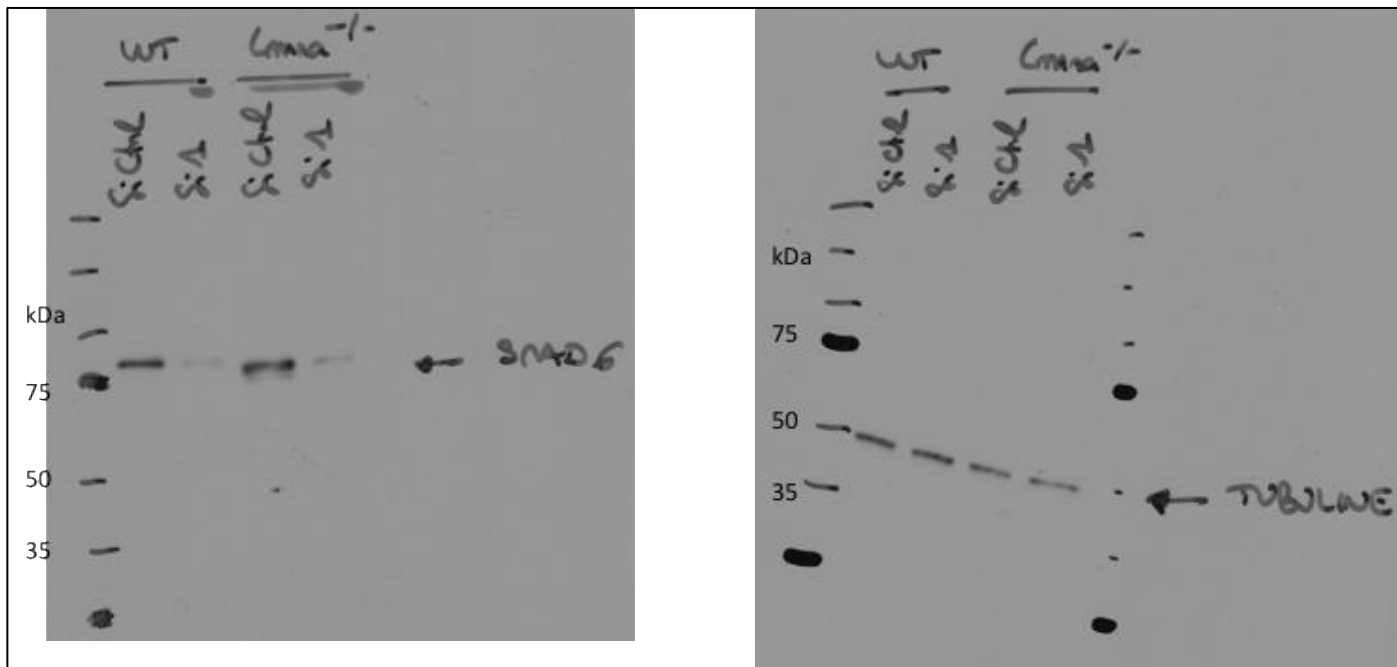

Smad6

Tubulin

**Figure 7.** Impaired BMP4 pathway in Human myoblasts carrying a false-sense mutation (*LMNA* p.Gln310\*)

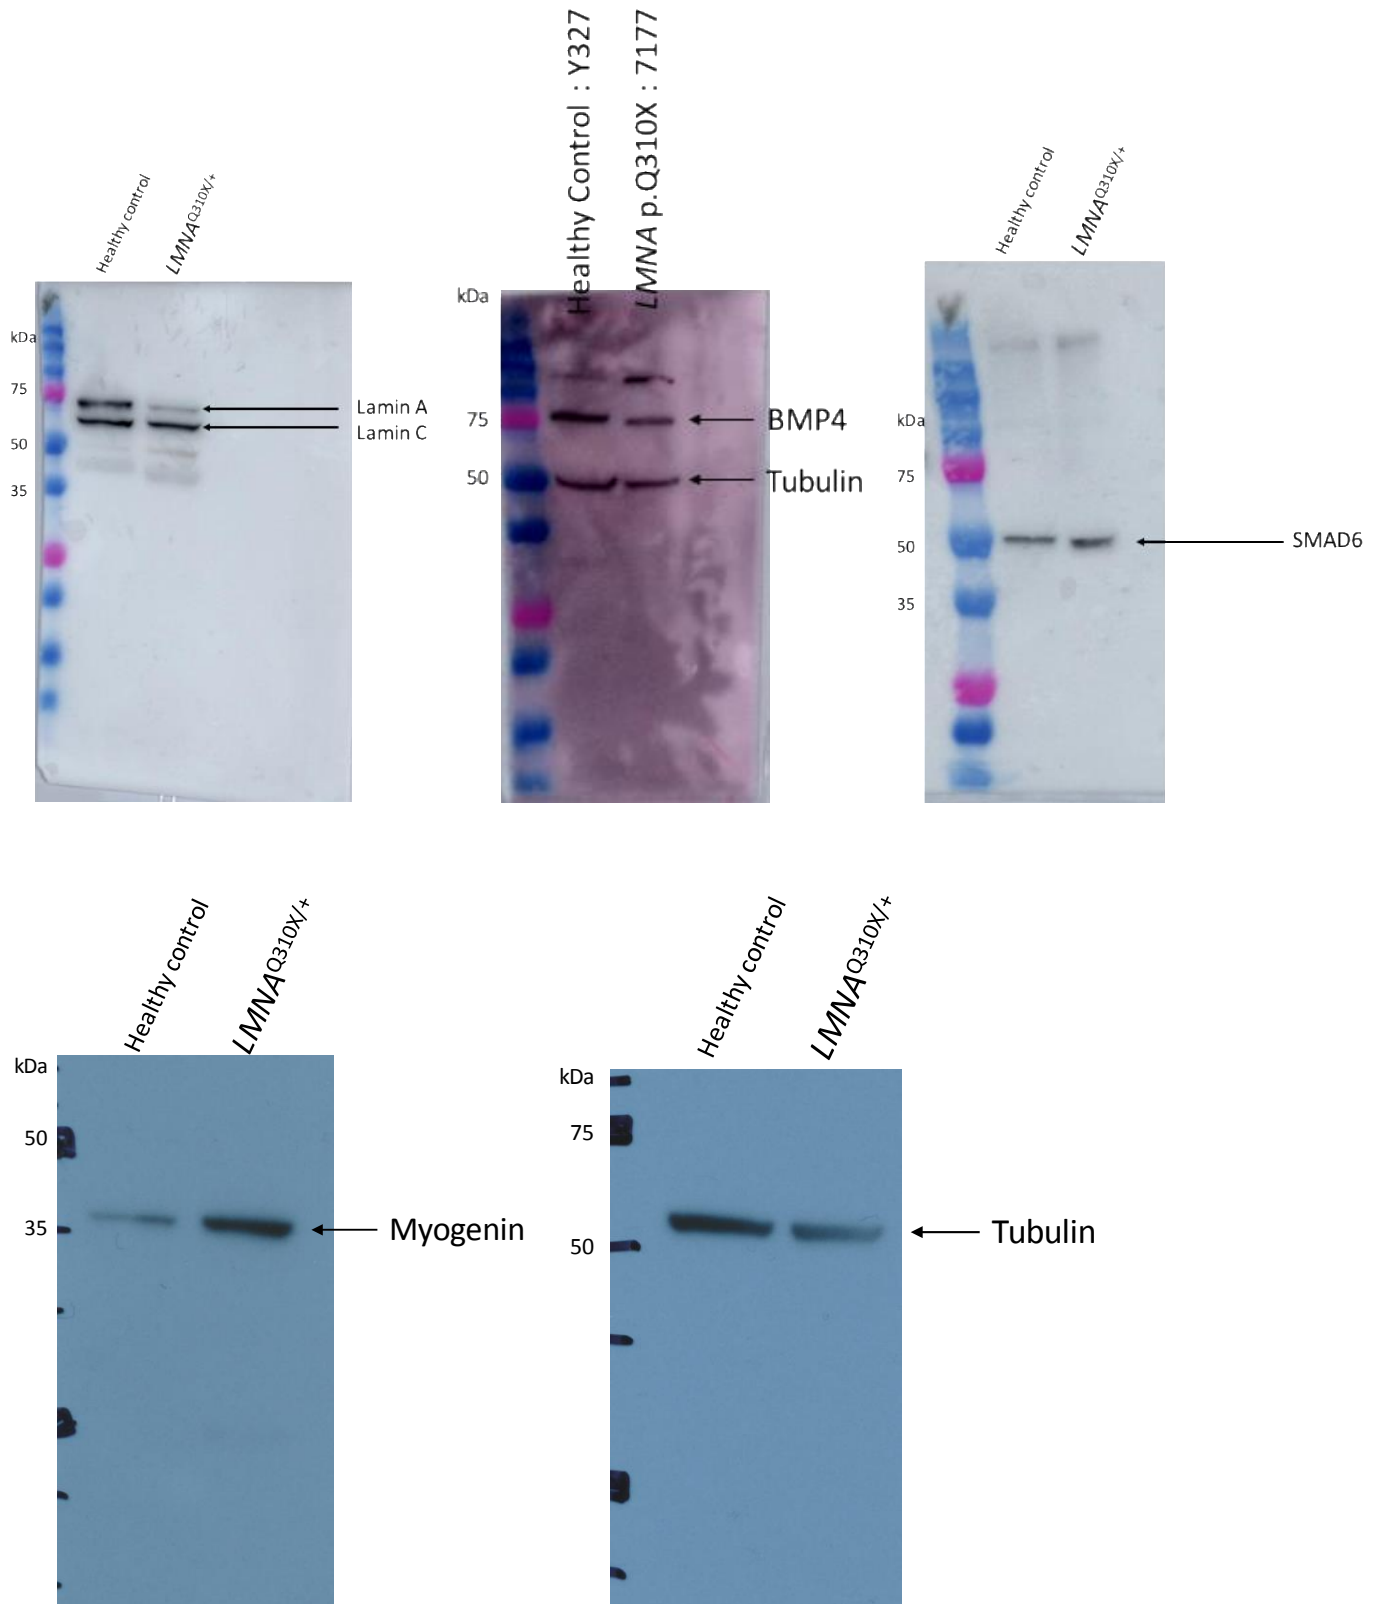

Supplement: 41598_2018_23918_MOESM1_ESM.pdf [file 41598_2018_23918_MOESM1_ESM.pdf]
